# Supplementary material for: Prediabetic changes in gene expression induced by aspartame and monosodium glutamate in Trans fat-fed C57Bl/6 J mice
Source: PubMed Central journal article supplement (PMC3727955; doi:10.1186/1743-7075-10-44), 2013-06-19
Supplement: 1743-7075-10-44-S1.pdf [file 1743-7075-10-44-S1.pdf]

## Diet composition

---

| <b>Ingredients (g/100g dietary weight)</b> | <b>TFA</b> | <b>ASP+TFA</b> | <b>MSG+TFA</b> | <b>ASP+MSG+TFA</b> |
|--------------------------------------------|------------|----------------|----------------|--------------------|
| Protein (%)                                | 19.1       | 19.1           | 19.1           | 19.1               |
| Carbohydrate (%)                           | 37.7       | 37.7           | 37.7           | 37.7               |
| Fat (%) (Ether extract)                    | 28         | 28             | 28             | 28                 |
| Fiber                                      | 4.3        | 4.3            | 4.3            | 4.3                |
| Vitamins, Minerals & Ash                   | 10.9       | 10.9           | 10.9           | 10.9               |
| Energy (kcal/g)                            | 4.39       | 4.39           | 4.39           | 4.39               |
| ASP (mg/kg BW)                             | 0          | 43.54          | 0              | 43.54              |
| MSG (mg/kg BW)                             | 0          | 0              | 130.03         | 130.03             |

---
