# Supplementary material for: Prediabetic changes in gene expression induced by aspartame and monosodium glutamate in Trans fat-fed C57Bl/6 J mice
Source: PubMed Central journal article supplement (PMC3727955; doi:10.1186/1743-7075-10-44), 2013-06-19

**Control**

**MSG**

**ASP**

**ASP+ MSG**

**A**

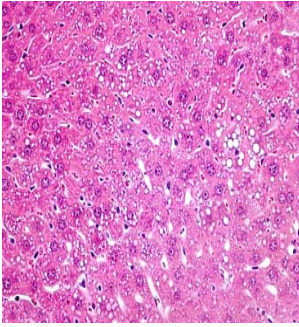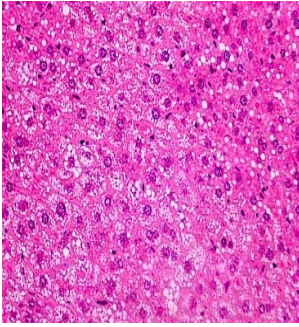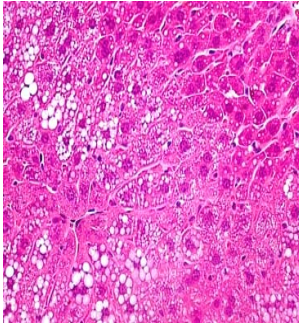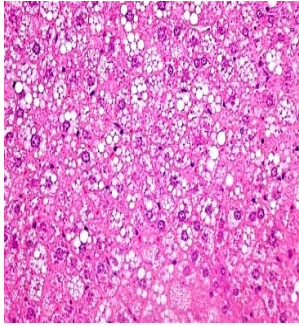

**B**

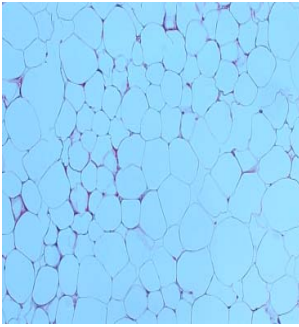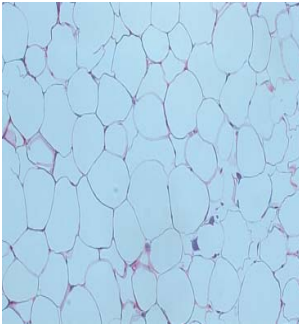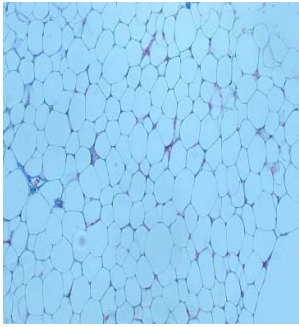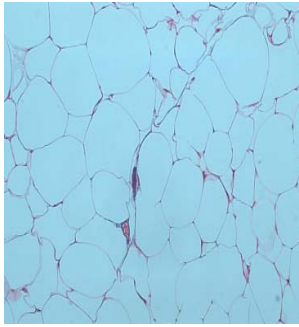

Supplement: 1743-7075-10-44-S3.pdf [file 1743-7075-10-44-S3.pdf]
