# Supplementary material for: Prediabetic changes in gene expression induced by aspartame and monosodium glutamate in Trans fat-fed C57Bl/6 J mice
Source: PubMed Central journal article supplement (PMC3727955; doi:10.1186/1743-7075-10-44), 2013-06-19

# LIVER

## A) MSG induced

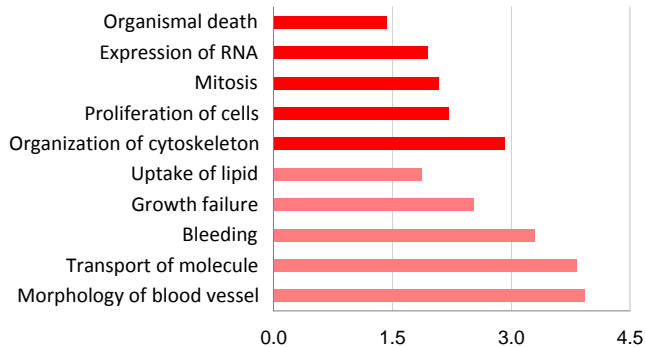

## C) ASP induced

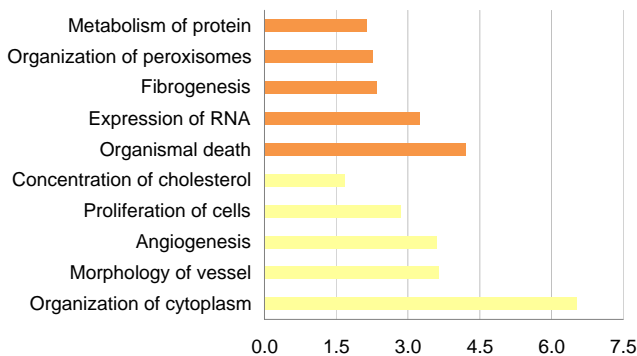

## E) ASP+MSG induced

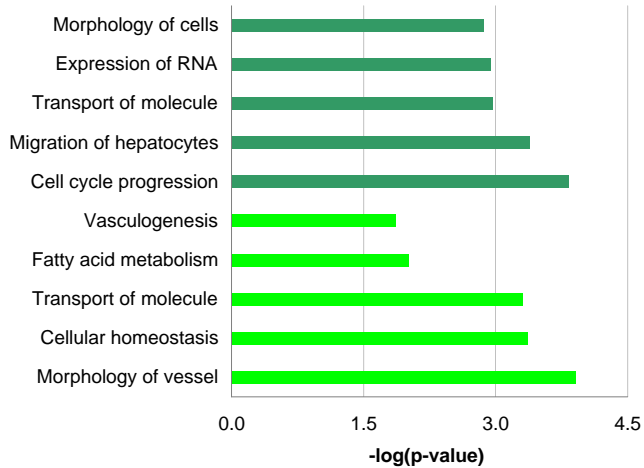

Downregulated

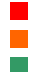

Upregulated

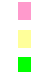

# ADIPOSE

## B) MSG induced

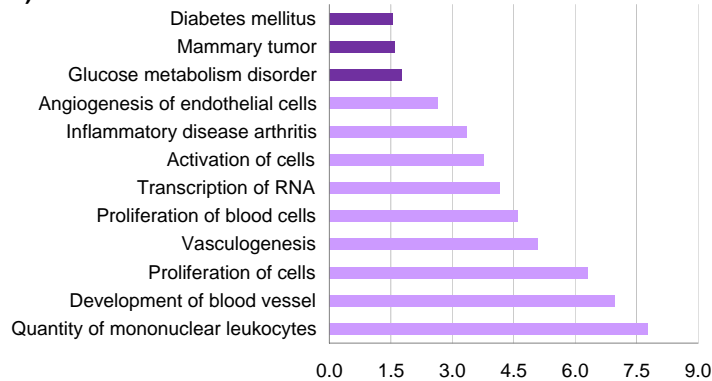

## D) ASP induced

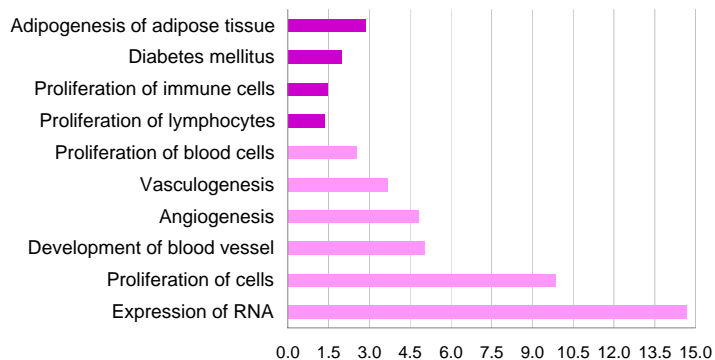

## F) ASP+MSG induced

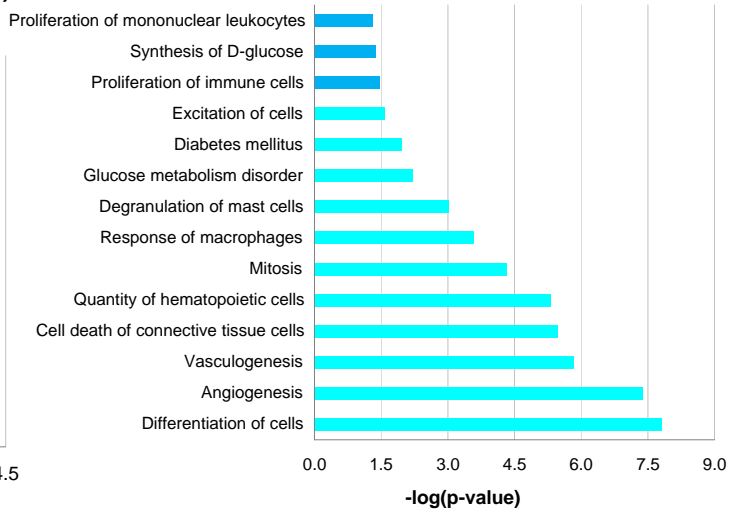

Downregulated

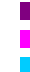

Upregulated

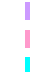

Supplement: 1743-7075-10-44-S5.pdf [file 1743-7075-10-44-S5.pdf]
